# Supplementary material
Source: Springer Nature journal article supplement (https://www.springermedizin.de/resource/supplementary/12906_2014_1904_MOESM2_ESM.pdf/9523144)

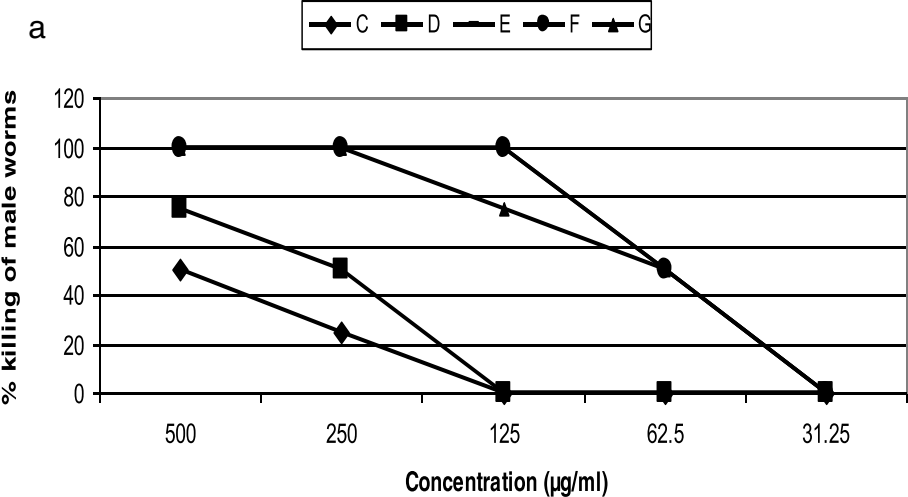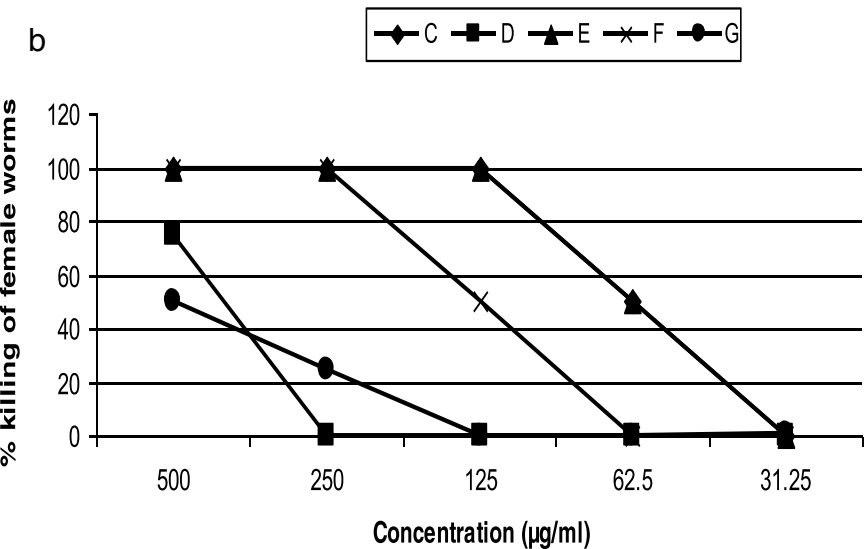

Supplement: MOESM2 [file 9523144]
